# Supplementary material
Source: PubMed Central journal article supplement (PMC9256793)
Supplement: NIHMS1814872-supplement-Supl_.pdf [file NIHMS1814872-supplement-Supl_.pdf]

# Supplementary Material

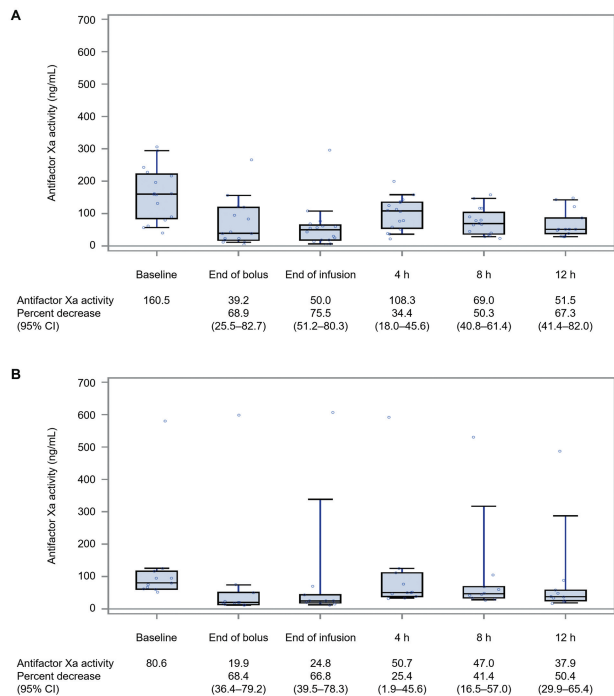

**Supplementary Fig. S1** Antifactor Xa activity at baseline and after administration of andexanet (patients on edoxaban with baseline antifactor Xa activity  $\geq 40$  ng/mL). (A) Edoxaban 60 mg. (B) Edoxaban 30 mg. CI, confidence interval.

**Supplementary Table S1** Andexanet dosing regimens

Panel A

|           | Intravenous bolus                    | Intravenous follow-on infusion |
|-----------|--------------------------------------|--------------------------------|
| High dose | 800 mg at a target rate of 30 mg/min | 960 mg at 8 mg/min for 120 min |
| Low dose  | 400 mg at a target rate of 30 mg/min | 480 mg at 4 mg/min for 120 min |

Panel B

| Dose                       | Timing          |          |
|----------------------------|-----------------|----------|
|                            | <8 h or unknown | ≥8 h     |
| Edoxaban ≤30 mg            | Low dose        | Low dose |
| Edoxaban >30 mg or unknown | High dose       |          |

**Supplementary Table S2** Rating system for hemostatic efficacy

| Bleed type                                              | Excellent (effective)                                                                                                                                                                                | Good (effective)                                                                                                                                                                                              | Poor/none (not effective)                                                                                                                                          |
|---------------------------------------------------------|------------------------------------------------------------------------------------------------------------------------------------------------------------------------------------------------------|---------------------------------------------------------------------------------------------------------------------------------------------------------------------------------------------------------------|--------------------------------------------------------------------------------------------------------------------------------------------------------------------|
| Visible                                                 | Cessation of bleeding $\leq 1$ h after the end of infusion <i>and</i> no plasma, coagulation factor, or blood products (excludes pRBCs) <sup>a</sup>                                                 | Cessation of bleeding between $>1$ and $\leq 4$ h after the end of infusion <i>and</i> $\leq 2$ units of plasma, coagulation factor, or blood products (excludes pRBCs) <sup>b</sup>                          | Cessation of bleeding $>4$ h after the end of the infusion <i>and/or</i> $>2$ units of plasma, coagulation factor, or blood products (excludes pRBCs) <sup>c</sup> |
| Muscular/skeletal                                       | Pain relief or no increase in swelling or unequivocal improvement in objective signs of bleeding $\leq 1$ h after the end of infusion, and the condition has not deteriorated during the 12-h period | Pain relief or no increase in swelling or unequivocal improvement in objective signs of bleeding $>1$ and $\leq 4$ h after the end of infusion, and the condition has not deteriorated during the 12-h period | No improvement by 4 h after the end of infusion <i>and/or</i> the condition has deteriorated during the 12-h period                                                |
| Intracerebral hematoma                                  | $\leq 20\%$ increase in hematoma volume compared with baseline on a repeat CT or MRI scan performed at both the 1- and 12-h postinfusion time points                                                 | $>20\%$ but $\leq 35\%$ increase in hematoma volume compared with baseline on a repeat CT or MRI scan at +12-h time point                                                                                     | $>35\%$ increase in hematoma volume on a CT or MRI compared with baseline on a repeat CT or MRI scan at +12-h time point                                           |
| Subarachnoid bleed                                      | $\leq 20\%$ increase in maximum thickness using the most dense area on the follow-up vs. baseline at both the 1- and 12-h postinfusion time points                                                   | $>20\%$ but $<35\%$ increase in maximum thickness using the most dense area on the follow-up at +12 h vs. baseline                                                                                            | $>35\%$ increase in maximum thickness using the most dense area on the follow-up at +12 h vs. baseline                                                             |
| Subdural hematoma                                       | $\leq 20\%$ increase in maximum thickness at both the 1- and 12-h postinfusion assessments compared with baseline                                                                                    | $>20\%$ but $<35\%$ increase in maximum thickness at +12 h compared with baseline                                                                                                                             | $>35\%$ increase in maximum thickness at +12 h compared with baseline                                                                                              |
| Pericardial                                             | No increase in the size of pericardial effusion on repeat echocardiogram done within 12 h of the end of infusion                                                                                     | $<10\%$ increase in the size of pericardial effusion on repeat echocardiogram done within 12 h of the end of infusion                                                                                         | $\geq 10\%$ increase in the size of pericardial effusion on repeat echocardiogram done within 12 h of the end of infusion                                          |
| Intraspinal                                             | No increase in hematoma size on repeat CT or MRI scan done within 12 h of the end of infusion                                                                                                        | $<10\%$ increase in hematoma size on repeat CT or MRI scan done within 12 h of the end of infusion                                                                                                            | $\geq 10\%$ increase in hematoma size on repeat CT or MRI scan done within 12 h of the end of infusion                                                             |
| GI, urinary, or nonvisible bleeding not described above | $\leq 10\%$ decrease in both corrected hemoglobin/hematocrit at 12 h <sup>d,e</sup> compared with baseline                                                                                           | $>10\%$ to $\leq 20\%$ decrease in both corrected hemoglobin/hematocrit at 12 h compared with baseline <sup>d,e</sup>                                                                                         | $>20\%$ decrease in both corrected hemoglobin/hematocrit <sup>d,e</sup>                                                                                            |

Abbreviations: CT, computed tomography; GI, gastrointestinal; MRI, magnetic resonance imaging; pRBCs, packed red blood cells.

Note: Additional factors to be considered during adjudication:

1. Any additional diagnostic data for a particular bleeding site (e.g., nasogastric tube, ultrasound, GI endoscope, echocardiogram, or CT/MRI scans) will be taken into account for the overall assessment.
2. Any uncontrolled bleeding that did not respond to andexanet and was related to an underlying disease will be taken into account for the overall assessment.
3. Pain, swelling, and signs of bleeding are considered to be typical symptoms of musculoskeletal bleeding and are expected to be present at baseline.

<sup>a</sup>For all types of bleeding, no additional plasma, blood products (whole blood products not including pRBCs), and/or coagulation factor products required after initial treatment with andexanet.

<sup>b</sup>For all types of bleeding, no more than two additional units of plasma or blood products and/or coagulation factor products required after initial treatment with andexanet.

<sup>c</sup>For all types of bleeding, more than two additional units of plasma or blood products and/or coagulation factor products required after initial treatment with andexanet. "Blood products" include whole blood but not pRBCs.

<sup>d</sup>The smallest percentage decrease in hemoglobin or hematocrit should be used to determine the efficacy rating of excellent, good, or poor/none. The net change is defined as the difference between the corrected hemoglobin or hematocrit value at baseline and 12 hours after infusion.

<sup>e</sup>For the adjusted hemoglobin and hematocrit calculation, it will be assumed that for each unit of pRBC transfusion there is an increase of 1 g/dL in hemoglobin and a 3% increase in hematocrit.

**Supplementary Table S3** Hemostatic efficacy according to HAS-BLED score

|                                                   | Patients with atrial fibrillation or atrial flutter, with baseline antifactor Xa activity $\geq 40$ ng/mL (N = 27) |                                     |            |
|---------------------------------------------------|--------------------------------------------------------------------------------------------------------------------|-------------------------------------|------------|
|                                                   | HAS-BLED score 0–2 (N = 17)                                                                                        |                                     |            |
|                                                   | Patients                                                                                                           | Excellent or good hemostasis, n (%) | 95% CI (%) |
| All                                               | 17                                                                                                                 | 14 (82.4)                           | 56.6–96.2  |
| Patients with intracranial hemorrhage             | 15                                                                                                                 | 12 (80.0)                           | 51.9–95.7  |
| Patients with intracerebral bleeding <sup>a</sup> | 12                                                                                                                 | 9 (75.0)                            | 42.8–94.5  |
|                                                   | HAS-BLED score $\geq 3$ (N = 10)                                                                                   |                                     |            |
|                                                   | Patients                                                                                                           | Excellent or good hemostasis, n (%) | 95% CI (%) |
| All                                               | 10                                                                                                                 | 8 (80.0)                            | 44.4–97.5  |
| Patients with intracranial hemorrhage             | 6                                                                                                                  | 6 (100.0)                           | 54.1–100.0 |
| Patients with intracerebral bleeding <sup>a</sup> | 4                                                                                                                  | 4 (100.0)                           | 39.8–100.0 |

Abbreviation: CI, confidence interval.

<sup>a</sup>Patients with intracerebral bleeding are a subset of patients with intracranial hemorrhage.

**Supplementary Table S4** Thrombotic events through day 30 according to CHA<sub>2</sub>DS<sub>2</sub>-VASc score

|                                                    | Safety population, including patients with atrial fibrillation or atrial flutter (N = 34) |              |           |                       |
|----------------------------------------------------|-------------------------------------------------------------------------------------------|--------------|-----------|-----------------------|
|                                                    | CHA <sub>2</sub> DS <sub>2</sub> -VASc score 0–4 (N = 24)                                 |              |           |                       |
|                                                    | Total                                                                                     | Up to 5 days | Days 6–14 | Days 15–30            |
| Patients with at least one thrombotic event, n (%) | 2 (8.3)                                                                                   | 1 (4.2)      | 1 (4.2)   | 0 (0)                 |
| Myocardial infarction, n (%)                       | 0 (0)                                                                                     | 0 (0)        | 0 (0)     | 0 (0)                 |
| Ischemic stroke, n (%)                             | 2 (8.3)                                                                                   | 1 (4.2)      | 1 (4.2)   | 0 (0)                 |
| Transient ischemic attack, n (%)                   | 0 (0)                                                                                     | 0 (0)        | 0 (0)     | 0 (0)                 |
| Deep vein thrombosis, n (%)                        | 0 (0)                                                                                     | 0 (0)        | 0 (0)     | 0 (0)                 |
| Pulmonary embolism, n (%)                          | 0 (0)                                                                                     | 0 (0)        | 0 (0)     | 0 (0)                 |
| Systemic embolism, n (%)                           | 0 (0)                                                                                     | 0 (0)        | 0 (0)     | 0 (0)                 |
| Death, n (%)                                       | 0 (0)                                                                                     | 0 (0)        | 0 (0)     | 0 (0)                 |
| Cardiovascular, n (%)                              | 0 (0)                                                                                     | 0 (0)        | 0 (0)     | 0 (0)                 |
| Noncardiovascular, n (%)                           | 0 (0)                                                                                     | 0 (0)        | 0 (0)     | 0 (0)                 |
|                                                    | CHA <sub>2</sub> DS <sub>2</sub> -VASc score $\geq 5$ (N = 10)                            |              |           |                       |
|                                                    | Total                                                                                     | Up to 5 days | Days 6–14 | Days 15–30            |
| Patients with at least one thrombotic event, n (%) | 2 (20.0)                                                                                  | 1 (10.0)     | 0 (0)     | 1 (10.0)              |
| Myocardial infarction, n (%)                       | 0 (0)                                                                                     | 0 (0)        | 0 (0)     | 0 (0)                 |
| Ischemic stroke, n (%)                             | 0 (0)                                                                                     | 0 (0)        | 0 (0)     | 0 (0)                 |
| Transient ischemic attack, n (%)                   | 1 (10.0)                                                                                  | 1 (10.0)     | 0 (0)     | 0 (0)                 |
| Deep vein thrombosis, <sup>a</sup> n (%)           | 1 (10.0)                                                                                  | 0 (0)        | 0 (0)     | 1 (10.0) <sup>b</sup> |
| Pulmonary embolism, <sup>a</sup> n (%)             | 1 (10.0)                                                                                  | 0 (0)        | 0 (0)     | 1 (10.0) <sup>b</sup> |
| Systemic embolism, n (%)                           | 0 (0)                                                                                     | 0 (0)        | 0 (0)     | 0 (0)                 |
| Death, <sup>c</sup> n (%)                          | 3 (30.0)                                                                                  | 2 (20.0)     | 1 (10.0)  | 0 (0)                 |
| Cardiovascular, n (%)                              | 2 (20.0)                                                                                  | 1 (10.0)     | 1 (10.0)  | 0 (0)                 |
| Noncardiovascular, n (%)                           | 1 (10.0)                                                                                  | 1 (10.0)     | 0 (0)     | 0 (0)                 |

<sup>a</sup>Deep vein thrombosis and pulmonary embolism occurred in the same patient.

<sup>b</sup>Patient had been restarted on heparin on day 5, and the deep vein thrombosis/pulmonary embolism occurred on day 15.

<sup>c</sup>None of the patients who died was reported to have experienced a thrombotic event.

**Supplementary Table S5** Glasgow Coma Scale score before and after andexanet treatment

| Time                                   | Patients with data | Glasgow Coma Scale score, median (IQR) |
|----------------------------------------|--------------------|----------------------------------------|
| Within 15 min prior to andexanet bolus | 28                 | 15 (12.5–15)                           |
| 1 h after andexanet bolus              | 27                 | 15 (11–15)                             |
| 12 h after andexanet bolus             | 26                 | 15 (12–15)                             |
| Day 30                                 | 21                 | 15 (15–15)                             |

Abbreviation: IQR, interquartile range.

**Supplementary Table S6** Characteristics and outcomes of patients on edoxaban who did *not* achieve excellent or good hemostasis

A: Baseline characteristics

|                                                                         | Efficacy population, patients with baseline antifactor Xa activity $\geq 40$ ng/mL who did not achieve excellent or good hemostasis (N = 6) | Efficacy population, patients with baseline antifactor Xa activity $\geq 75$ ng/mL who did not achieve excellent or good hemostasis (N = 5) |
|-------------------------------------------------------------------------|---------------------------------------------------------------------------------------------------------------------------------------------|---------------------------------------------------------------------------------------------------------------------------------------------|
| Age (y), mean $\pm$ SD                                                  | 83.5 $\pm$ 5.2                                                                                                                              | 84.2 $\pm$ 5.4                                                                                                                              |
| Male sex, n (%)                                                         | 4 (66.7)                                                                                                                                    | 3 (60.0)                                                                                                                                    |
| White race, n (%)                                                       | 5 (83.3)                                                                                                                                    | 4 (80.0)                                                                                                                                    |
| Body mass index (kg/m <sup>2</sup> ), mean $\pm$ SD                     | 23.6 $\pm$ 4.5                                                                                                                              | 22.2 $\pm$ 3.1                                                                                                                              |
| Estimated creatinine clearance, <sup>a</sup> n (%)                      |                                                                                                                                             |                                                                                                                                             |
| <30 mL/min                                                              | 1 (16.7)                                                                                                                                    | 1 (20.0)                                                                                                                                    |
| 30–59.9 mL/min                                                          | 3 (50.0)                                                                                                                                    | 3 (60.0)                                                                                                                                    |
| $\geq 60$ mL/min                                                        | 2 (33.3)                                                                                                                                    | 1 (20.0)                                                                                                                                    |
| Primary indication for anticoagulation, <sup>b</sup> n (%)              |                                                                                                                                             |                                                                                                                                             |
| Atrial fibrillation                                                     | 4 (66.7)                                                                                                                                    | 4 (80.0)                                                                                                                                    |
| Atrial flutter                                                          | 1 (16.7)                                                                                                                                    | 0 (0)                                                                                                                                       |
| Venous thromboembolism <sup>c</sup>                                     | 1 (16.7)                                                                                                                                    | 1 (20.0)                                                                                                                                    |
| Medical history, n (%)                                                  |                                                                                                                                             |                                                                                                                                             |
| Myocardial infarction                                                   | 1 (16.7)                                                                                                                                    | 1 (20.0)                                                                                                                                    |
| Stroke                                                                  | 1 (16.7)                                                                                                                                    | 1 (20.0)                                                                                                                                    |
| Deep vein thrombosis                                                    | 1 (16.7)                                                                                                                                    | 1 (20.0)                                                                                                                                    |
| Atrial fibrillation                                                     | 4 (66.7)                                                                                                                                    | 4 (80.0)                                                                                                                                    |
| Heart failure                                                           | 1 (16.7)                                                                                                                                    | 1 (20.0)                                                                                                                                    |
| Diabetes mellitus                                                       | 0 (0)                                                                                                                                       | 0 (0)                                                                                                                                       |
| Hypertension                                                            | 5 (83.3)                                                                                                                                    | 4 (80.0)                                                                                                                                    |
| CHA <sub>2</sub> DS <sub>2</sub> -VASc score, median (IQR) <sup>d</sup> | 3 (3–5)                                                                                                                                     | 4 (2.5–5.5)                                                                                                                                 |
| HAS-BLED score, median (IQR) <sup>d</sup>                               | 2 (2–3)                                                                                                                                     | 2.5 (2–3.5)                                                                                                                                 |
| Hemoglobin (g/L), mean $\pm$ SD                                         | 125.2 $\pm$ 25.4                                                                                                                            | 119.0 $\pm$ 22.7                                                                                                                            |
| Platelet count (10 <sup>9</sup> /L), mean $\pm$ SD                      | 201.7 $\pm$ 42.3                                                                                                                            | 201.0 $\pm$ 47.3                                                                                                                            |
| Primary site of bleeding, n (%)                                         |                                                                                                                                             |                                                                                                                                             |
| Intracranial, any                                                       | 4 (66.7)                                                                                                                                    | 3 (60.0)                                                                                                                                    |
| Intracranial, associated with trauma <sup>e</sup>                       | 1 (25.0)                                                                                                                                    | 1 (33.3)                                                                                                                                    |
| Gastrointestinal                                                        | 2 (33.3)                                                                                                                                    | 2 (40.0)                                                                                                                                    |
| Edoxaban dosage, n (%)                                                  |                                                                                                                                             |                                                                                                                                             |
| 60 mg once daily                                                        | 2 (33.3)                                                                                                                                    | 1 (20.0)                                                                                                                                    |
| 30 mg once daily                                                        | 3 (50.0)                                                                                                                                    | 3 (60.0)                                                                                                                                    |

(Continued)

**Supplementary Table S6** (Continued)

|                                                                                         | Efficacy population, patients with baseline antifactor Xa activity $\geq 40$ ng/mL who did not achieve excellent or good hemostasis (N = 6) | Efficacy population, patients with baseline antifactor Xa activity $\geq 75$ ng/mL who did not achieve excellent or good hemostasis (N = 5) |
|-----------------------------------------------------------------------------------------|---------------------------------------------------------------------------------------------------------------------------------------------|---------------------------------------------------------------------------------------------------------------------------------------------|
| 15 mg once daily                                                                        | 1 (16.7)                                                                                                                                    | 1 (20.0)                                                                                                                                    |
| Baseline antifactor Xa activity (ng/mL), median (IQR)                                   | 162.4 (80.6–294.4)                                                                                                                          | 208.0 (116.8–294.4)                                                                                                                         |
| Time from last dose of edoxaban to andexanet bolus (h), median (IQR)                    | 9.3 (8.6–12.8)                                                                                                                              | 9.5 (8.6–12.8)                                                                                                                              |
| Time from presentation at the emergency department to andexanet bolus (h), median (IQR) | 2.3 (1.4–3.3)                                                                                                                               | 1.8 (1.3–15.0)                                                                                                                              |

Abbreviations: INR, international normalized ratio; IQR, interquartile range; SD, standard deviation.

<sup>a</sup>Creatinine clearance estimated according to the Cockcroft–Gault formula.

<sup>b</sup>If >1 primary indication for anticoagulation recorded: if atrial fibrillation was present, this was listed as the primary indication; if present, venous thromboembolism was considered primary in the remaining patients.

<sup>c</sup>Venous thromboembolism refers to prevention or treatment of deep vein thrombosis and pulmonary embolism.

<sup>d</sup>Reported for patients with atrial fibrillation or atrial flutter. The CHA<sub>2</sub>DS<sub>2</sub>-VASc score ranges from 0 to 9 (congestive heart failure [1], hypertension [1], age  $\geq 75$  years [2], diabetes [1], prior stroke or transient ischemic attack [2], vascular disease [1], age 65–74 years [1], female sex [1]). A modified HAS-BLED score is reported, ranging from 0 to 7 (hypertension [systolic blood pressure >160 mm Hg at baseline [1], abnormal kidney function [1], abnormal liver function [1], prior stroke [1], bleeding history [not including the qualifying bleeding event] or anemia [1], age >65 years [1], concomitant use of antiplatelet agents or nonsteroidal anti-inflammatory drugs [1]). As opposed to the original HAS-BLED score, the categories labile INR (not applicable) and alcohol use (data not available) were not considered.

<sup>e</sup>Denominators for percentage with traumatic intracranial hemorrhage are all patients with any intracranial hemorrhage.

B: Safety outcomes through 30 days after andexanet administration (there were no thrombotic events in patients who did not achieve excellent/good hemostasis at 12 hours)

|                          | <i>Efficacy population, patients with baseline antifactor Xa activity <math>\geq 40</math> ng/mL who did not achieve excellent/good hemostasis (N = 6)</i> |                     |                  |                   |
|--------------------------|------------------------------------------------------------------------------------------------------------------------------------------------------------|---------------------|------------------|-------------------|
|                          | <i>Total</i>                                                                                                                                               | <i>Up to 5 days</i> | <i>Days 6–14</i> | <i>Days 15–30</i> |
| Death, n (%)             | 2 (33.3)                                                                                                                                                   | 1 (16.7)            | 0 (0)            | 1 (16.7)          |
| Cardiovascular, n (%)    | 1 (16.7)                                                                                                                                                   | 0 (0)               | 0 (0)            | 1 (16.7)          |
| Noncardiovascular, n (%) | 1 (16.7)                                                                                                                                                   | 1 (16.7)            | 0 (0)            | 0 (0)             |
|                          | <i>Efficacy population, patients with baseline antifactor Xa activity <math>\geq 75</math> ng/mL who did not achieve excellent/good hemostasis (N = 5)</i> |                     |                  |                   |
|                          | <i>Total</i>                                                                                                                                               | <i>Up to 5 days</i> | <i>Days 6–14</i> | <i>Days 15–30</i> |
| Death, n (%)             | 2 (40.0%)                                                                                                                                                  | 1 (20.0)            | 0 (0)            | 1 (20.0)          |
| Cardiovascular, n (%)    | 1 (20.0%)                                                                                                                                                  | 0 (0)               | 0 (0)            | 1 (20.0)          |
| Noncardiovascular, n (%) | 1 (20.0%)                                                                                                                                                  | 1 (20.0)            | 0 (0)            | 0 (0)             |

#### ANNEXA-4 Investigators

| Name                    | Institution                                                            | Country |
|-------------------------|------------------------------------------------------------------------|---------|
| Luc Van Keer            | Ziekenhuis Oost-Limburg                                                | Belgium |
| Peter Verhamme          | University of Leuven                                                   | Belgium |
| Franck Verschuren       | Cliniques Universitaires Saint-Luc                                     | Belgium |
| Mark Blostein           | Jewish General Hospital                                                | Canada  |
| John Eikelboom          | Hamilton General Hospital                                              | Canada  |
| Christine Vallejo       | Emergency Département - Universitaire Hospital de Limoges              | France  |
| Jeannot Schmidt         | CHU de Clermont-Ferrand                                                | France  |
| Pierre Bouzat           | Grenoble University Hospital                                           | France  |
| Baptiste Hengy          | Hopital Edouard Herriot - Hospices Civils de Lyon                      | France  |
| Sebastian Schellong     | Studienambulanz der GWT-TUD GmbH am Krankenhaus Dresden-Friedrichstadt | Germany |
| Andreas Greinacher      | Universität Greifswald                                                 | Germany |
| Jan Beyer-Westendorf    | GWT-TUD                                                                | Germany |
| Hans-Christian Mochmann | Charite Kardiologie CBF                                                | Germany |
| Sabine Genth-Zotz       | Katholisches Klinikum Mainz                                            | Germany |
| Joerg Berrouschot       | Klinikum Altenburger Land                                              | Germany |
| Rainer Dziewas          | Universitätsklinik Münster, Neurologie                                 | Germany |
| Pawel Kermer            | Nordwest-Krankenhaus Sanderbusch                                       | Germany |
| Frank Hamann            | Klinikum Konstanz                                                      | Germany |
| Götz Thomalla           | University Medical Center Hamburg-Eppendorf                            | Germany |
| Sven Poli               | Universitätsklinikum Tübingen                                          | Germany |
| Bernd Kallmuenzer       | Neurologische Universitätsklinik Erlangen                              | Germany |
| Frank Hanses            | Klinikum der Universität Regensburg                                    | Germany |
| Peter Schellinger       | Johannes Wesling Klinikum Minden, Department of Neurology              | Germany |
| Jens Schwarze           | Klinikum Chemnitz                                                      | Germany |
| Frank Wollenweber       | Klinikum der Universität München                                       | Germany |
| Matthias von Mering     | Klinikum Bremen-Nord                                                   | Germany |

(Continued)

**ANNEXA-4** (Continued)

| Name                     | Institution                                                                                        | Country        |
|--------------------------|----------------------------------------------------------------------------------------------------|----------------|
| Carsten Pohlmann         | Asklepios Klinik Barmbek                                                                           | Germany        |
| Georg Royl               | Klinik für Neurologie, Station 39 SU, Zentralklinikum, Universitätsklinikum Holstein Campus Lübeck | Germany        |
| Ralf Zahn                | Klinikum der Stadt Ludwigshafen/Medizinische Klinik B                                              | Germany        |
| Katharina Althaus        | University Hospital Ulm                                                                            | Germany        |
| Thorsten Doeppner        | University Hospital of Goettingen                                                                  | Germany        |
| Dirk Haertel             | Klinikum Lippe GmbH                                                                                | Germany        |
| Georg Braun              | Klinikum Augsburg, III. Med. Klinik                                                                | Germany        |
| Steffen Schnupp          | Klinikum Coburg                                                                                    | Germany        |
| Lars Krause              | Klinikum Osnabrueck, Dep. of Neurology                                                             | Germany        |
| Matthias Maschke         | Krankenhaus der Barmherzigen Brüder Trier - Neurology                                              | Germany        |
| Ulrich Jaschinski        | Klinikum - Augsburg                                                                                | Germany        |
| Claudia Spies            | Charité Universitätsmedizin Berlin, Klinik für Anästhesiologie m.S. op. Intensivmedizin CCM/CVK    | Germany        |
| Dominik Michalski        | Universitätsklinikum Leipzig, Klinik und Poliklinik für Neurologie                                 | Germany        |
| Waltraud Pfeilschifter   | University Hospital Frankfurt, Neurology                                                           | Germany        |
| Karin Weissenborn        | Neurologische Klinik, Medical School Hannover                                                      | Germany        |
| Wolfgang Heide           | AKH Celle                                                                                          | Germany        |
| Christoph Gumbinger      | University Hospital Heidelberg, Neurology                                                          | Germany        |
| Hassan Soda              | RHÖN-KLINIKUM Campus Bad Neustadt                                                                  | Germany        |
| Kazunori Toyoda          | National Cerebral and Cardiovascular Center                                                        | Japan          |
| Shigeo Yamashiro         | Saiseikai Kumamoto Hospital, Social Welfare Organization Saiseikai Imperial Gift Foundation        | Japan          |
| Shu Hasegawa             | Japanese Red Cross Kumamoto Hospital                                                               | Japan          |
| Tomohiko Masuno          | Nippon Medical School Hospital                                                                     | Japan          |
| Shuji Arakawa            | Steel Memorial Yawata Hospital                                                                     | Japan          |
| Yuka Terasawa            | Brain Attack Center Ota Memorial Hospital                                                          | Japan          |
| Rei Kobayashi            | National Hospital Organization Nagoya Medical Center                                               | Japan          |
| Masayuki Ezura           | National Hospital Organization Sendai Medical Center                                               | Japan          |
| Yoji Komatsu             | Hitachi General Hospital, Hitachi, Ltd.                                                            | Japan          |
| Yoshihide Tanaka         | Yokosuka KyoUnited Statesi Hospital                                                                | Japan          |
| Michiel Coppens          | Academic Medical Center                                                                            | Netherlands    |
| Sanne van Wissen         | OLVG                                                                                               | Netherlands    |
| Eduardo Arellano-Rodrigo | Hospital Clínic of Barcelona                                                                       | Spain          |
| Ermengol Valles          | Hospital del Mar                                                                                   | Spain          |
| Richard Hall             | University Hospitals of North Midlands NHS Trust, Royal Stoke University Hospital                  | United Kingdom |
| Raza Alikhan             | University Hospital of Wales                                                                       | United Kingdom |
| Karen Breen              | Guy's & St Thomas' Hospital                                                                        | United Kingdom |
| Arvind Venkat            | Allegheny Health Network                                                                           | United States  |
| James Welker             | Anne Arundel Health System                                                                         | United States  |
| Daniel Pallin            | Brigham and Women's Hospital                                                                       | United States  |
| Truman Milling           | Seton Medical Centre Austin                                                                        | United States  |
| Theodore Takata          | THREI Consultants in Cardiology                                                                    | United States  |
| Majed Refaai             | University of Rochester Medical Center                                                             | United States  |



**ANNEXA-4** (Continued)

| Name                | Institution                                                                            | Country       |
|---------------------|----------------------------------------------------------------------------------------|---------------|
| Joshua Goldstein    | Massachusetts General Hospital                                                         | United States |
| Ian Welsby          | Duke University                                                                        | United States |
| Carol Clark         | Beaumont Hospital                                                                      | United States |
| Jason Wilson        | Tampa General Hospital                                                                 | United States |
| Michael Spohn       | Hospital Physicians in Clinical Research                                               | United States |
| Gregory Fermann     | University of Cincinnati                                                               | United States |
| Mauricio Concha     | Sarasota Memorial Hospital                                                             | United States |
| Dean Kereiakes      | The Lindner Center for Research & Education at The Christ Hospital                     | United States |
| James Fulmer        | River City Clinical Research                                                           | United States |
| Alvin Schmaier      | University Hospitals Cleveland Medical Center                                          | United States |
| John Cornell        | Marshall University Clinical Research Center                                           | United States |
| Nirav S. Patel      | Long Beach Memorial Medical Center                                                     | United States |
| Aveh Bastani        | Troy Beaumont Hospital                                                                 | United States |
| Rishi Anand         | Holy Cross Hospital                                                                    | United States |
| Truman Milling      | Dell University of Texas Medical School/<br>Seton Dell Medical School Stroke Institute | United States |
| William Shillinglaw | Mission Hospital                                                                       | United States |
| Evan Schwarz        | Washington University School of Medicine                                               | United States |
| Mohammed Rehman     | Henry Ford Hospital                                                                    | United States |
